# Supplementary material
Source: PubMed Central journal article supplement (PMC5617283)
Supplement: pnas.1706795114.sapp.pdf [file pnas.1706795114.sapp.pdf]

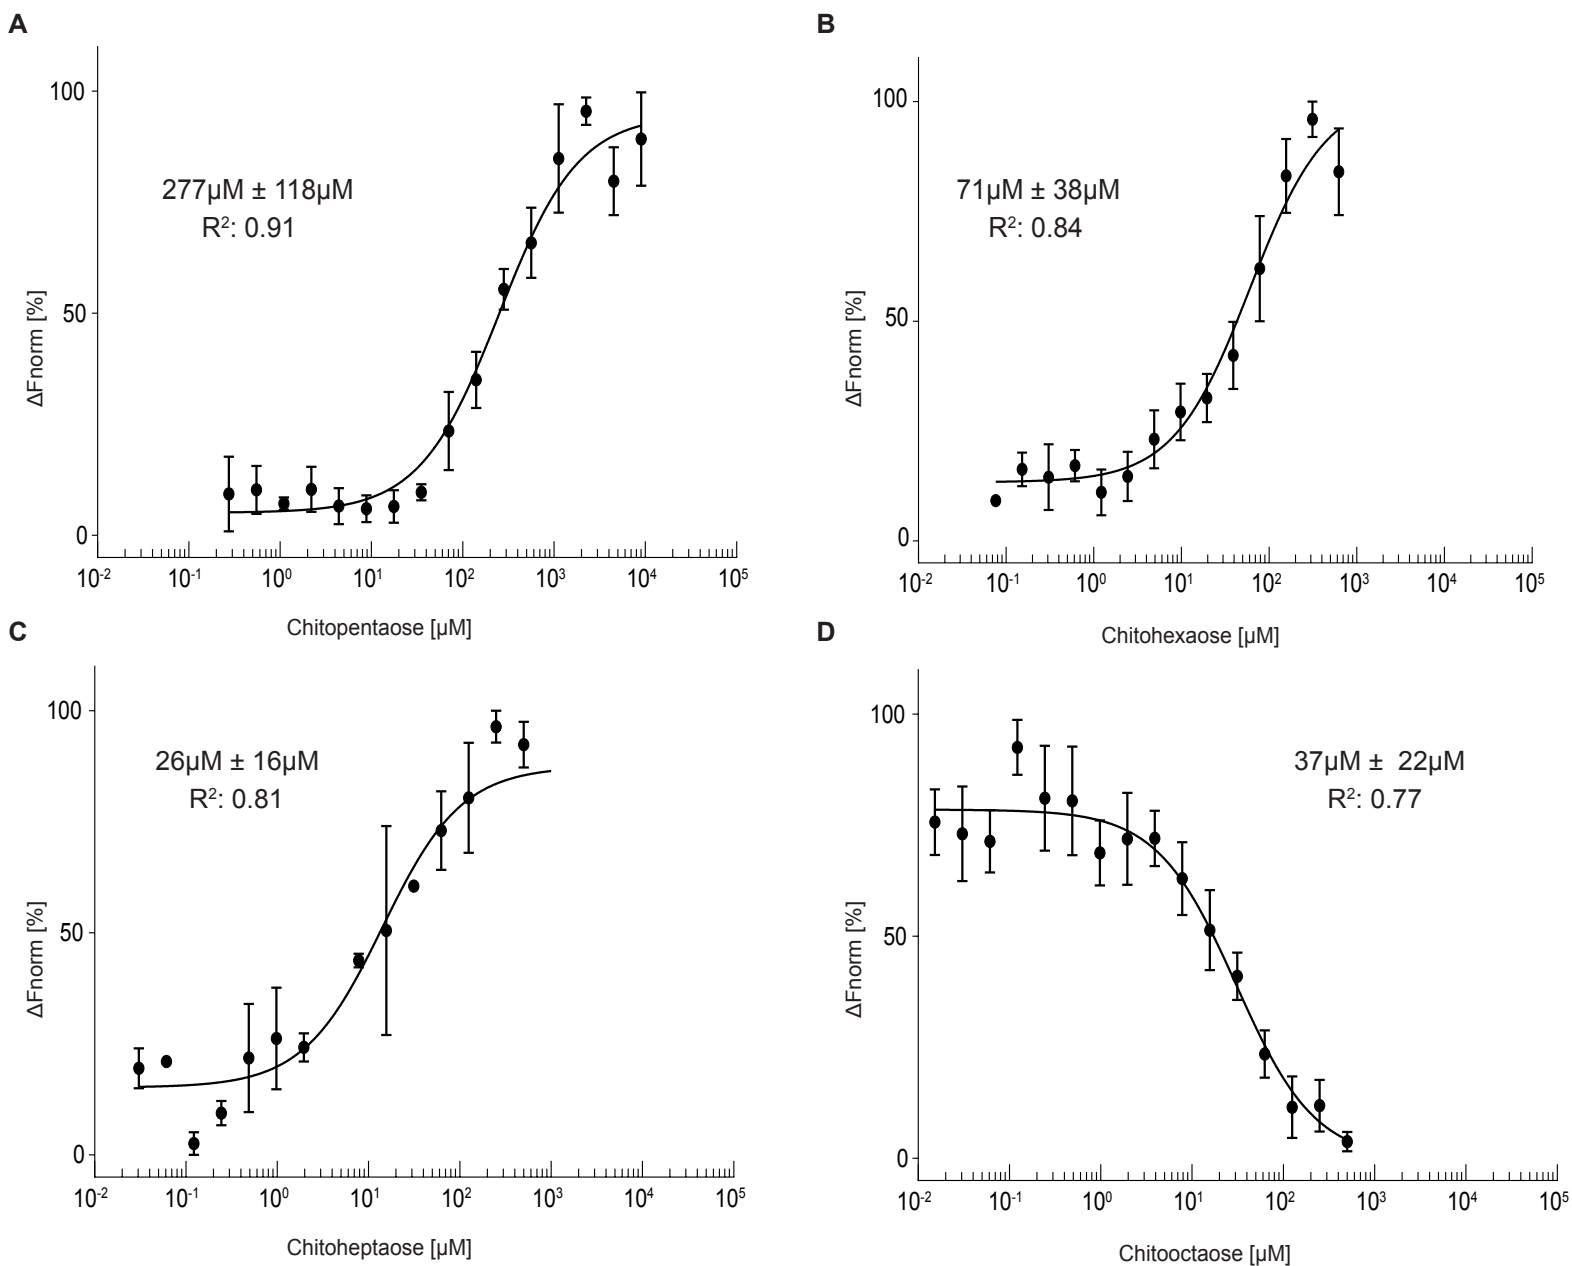

**Fig. S1.** Binding curves for the *LjLYS6* ectodomain obtained from Microscale Thermophoresis (MST) and used for calculating  $K_D$  values shown in Table 1.

Analysis of MST data of *LjLYS6* ectodomain binding to different lengths of chitin oligomers, (A) Chitopentaose, (B) Chitohexaose, (C) Chitoheptaose and (D) Chitooctaose. The change in fluorescence in a thermal gradient ( $\Delta F$ ) as a function of ligand concentration is plotted. The  $K_D$  values  $\pm$  s.e.m. are indicated together with the  $R^2$  fit. The binding curves represent measurements where each data point was derived from three (A, C) or four (B, D) biological replicates.

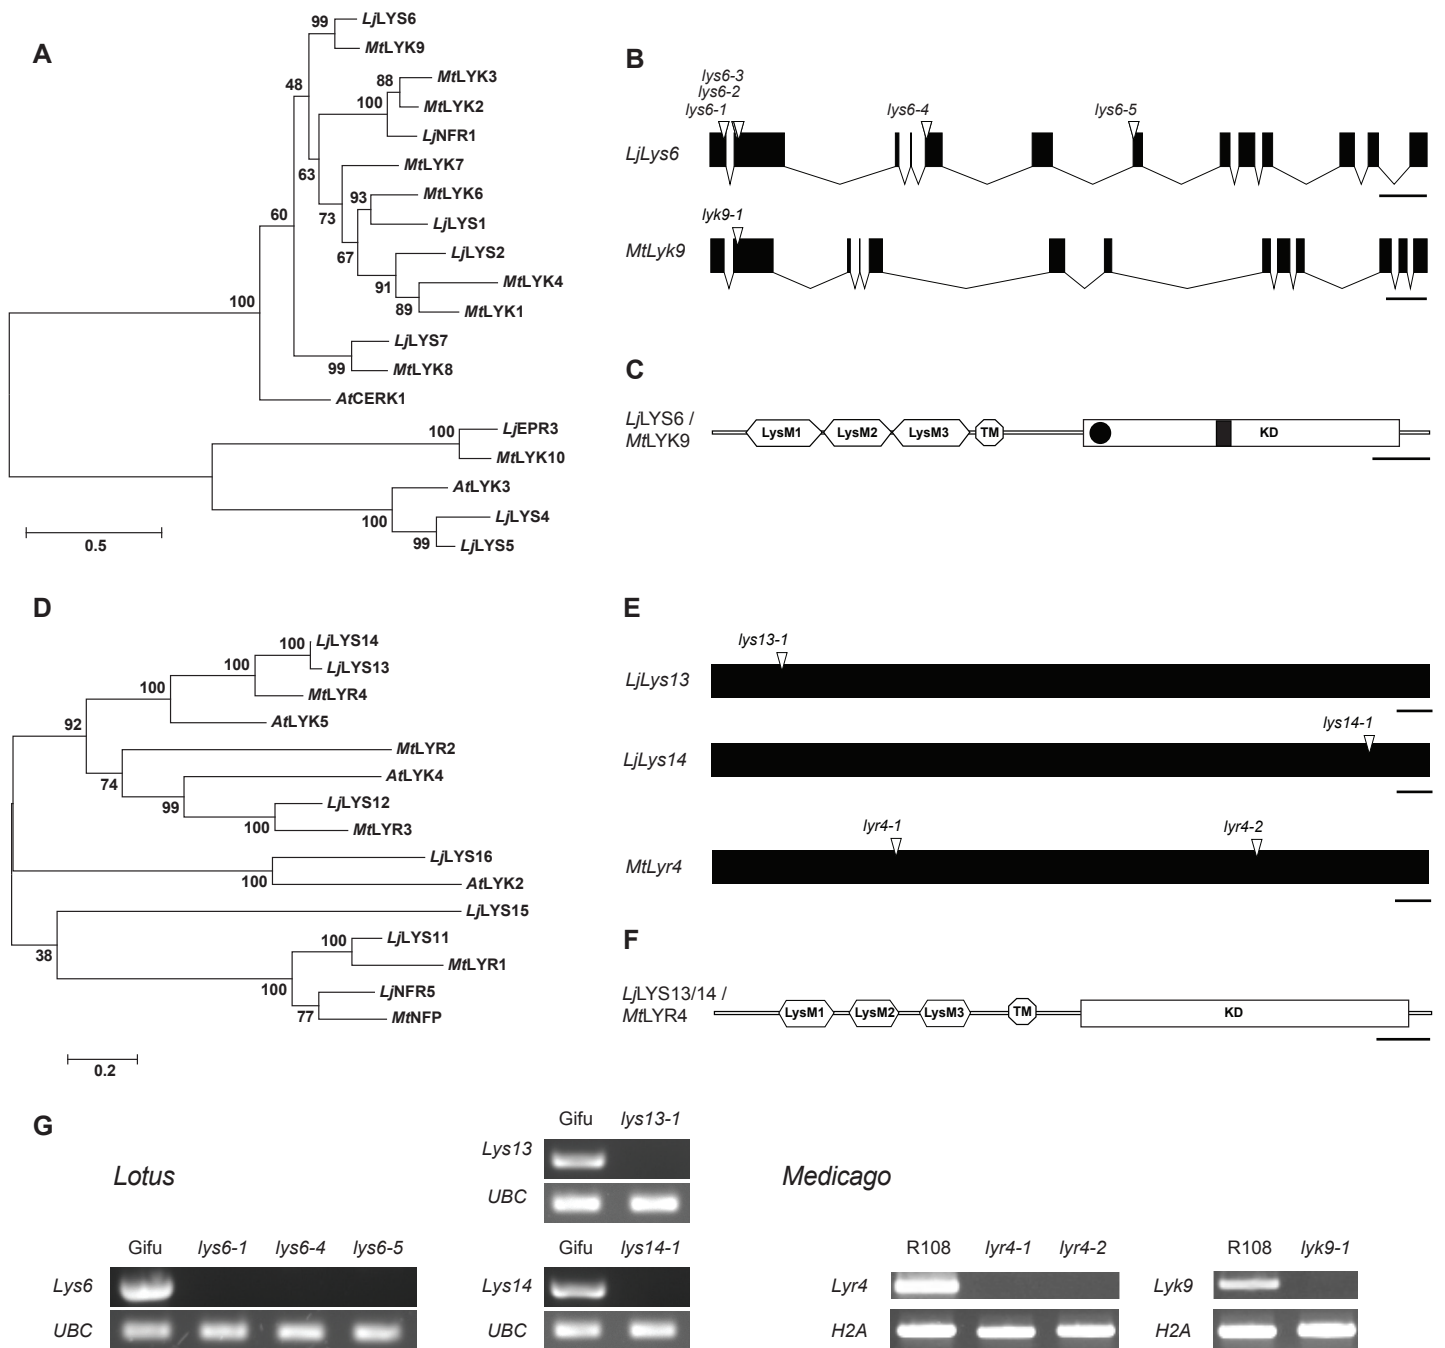

**Fig. S2.** Phylogeny, gene- and protein structures of *LjLYS6*, *MtLYK9* and *LjLYS13*, *LjLYS14* and *MtLYR4*. (A) Unrooted maximum likelihood (ML) phylogenetic tree of full length NFR1/LYK3 type LysM receptor kinase proteins from *Lotus* (*Lj*), *Medicago* (*Mt*) and the *Arabidopsis* (*At*) CERK1 and LYK3 proteins. For each node bootstrap values are shown as percentages based on 1000 repetitions. Branch lengths are proportional to the number of substitutions per site (bar). (B) Intron-exon structure of the *LjLys6* and *MtLyk9* genes. White triangles show the position of LORE1 and *Tnt1* retrotransposon insertions respectively. (C) Schematic domain structure of the *LjLYS6* and *MtLYK9* proteins. LysM1, 2, 3: LysM domains, TM: transmembrane domain, KD: kinase domain, black circle: kinase ATP binding site, black rectangle: Ser/Thr kinase active site. (D) Unrooted ML phylogenetic tree of full length NFR5/NFP type LysM receptor kinase proteins from *Lotus* (*Lj*), *Medicago* (*Mt*) and the *Arabidopsis* (*At*) LYK2, 4 and 5 proteins. For each node bootstrap values are shown as percentages based on 1000 repetitions. Branch lengths are proportional to the number of substitutions per site (bar). Note that *LjLys13* and *LjLys14* are tandem repeat genes located next to each other on *Lotus* chromosome 2 of while the corresponding *MtLyr4* is a single copy gene in *Medicago*. (E) Intron-exon structure of the *LjLys13*, *LjLys14* and *MtLyr4* genes. White triangles show the position of LORE1 and *Tnt1* retrotransposon insertions respectively. (F) Schematic domain structure of the *LjLYS13*, *LjLYS14* and *MtLYR4* proteins. LysM1, 2, 3: LysM domains, TM: transmembrane domain, KD: kinase domain. (G) Semiquantitative RT-PCR to detect transcripts of the receptor genes in wild type and mutant plants. Transcripts of the *L. japonicus* ubiquitin-conjugating enzyme (*UBC*) and *M. truncatula* histone *H2A* respectively were used as control.

Gifu CO8

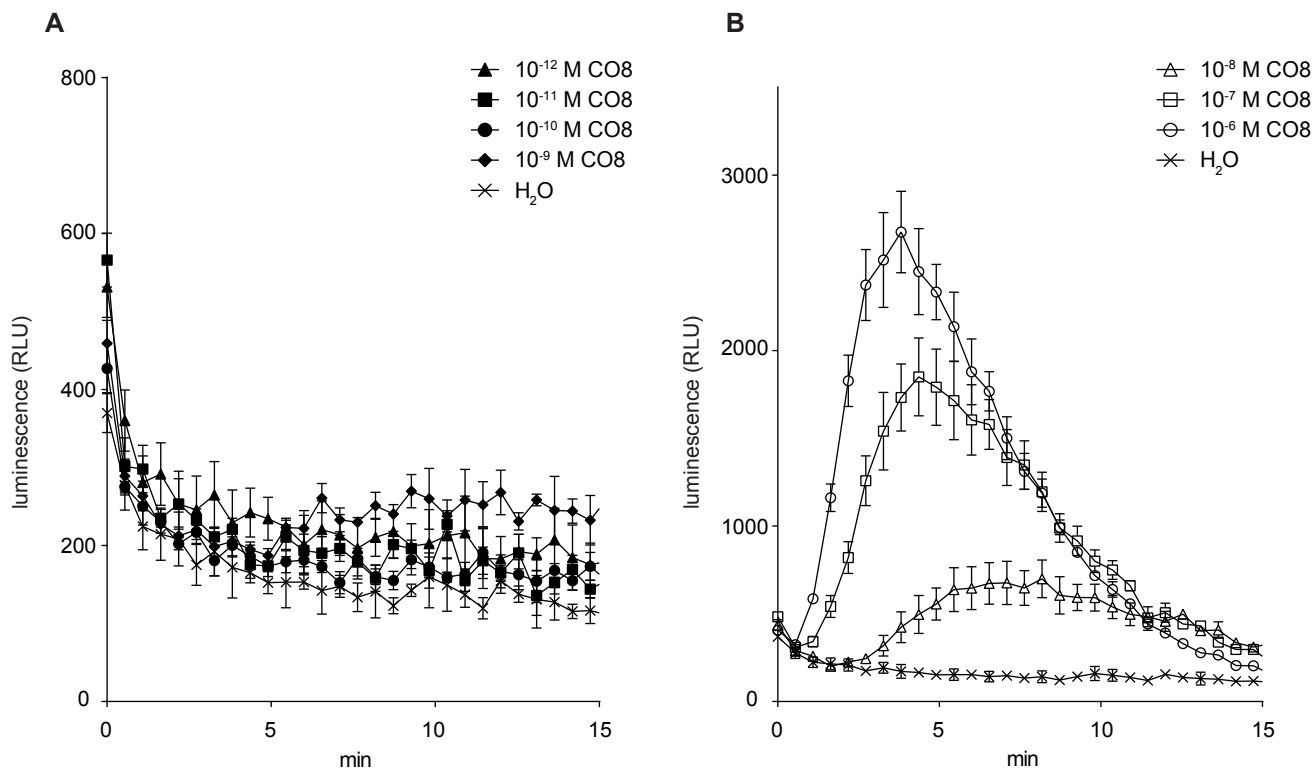

Gifu R7A NF

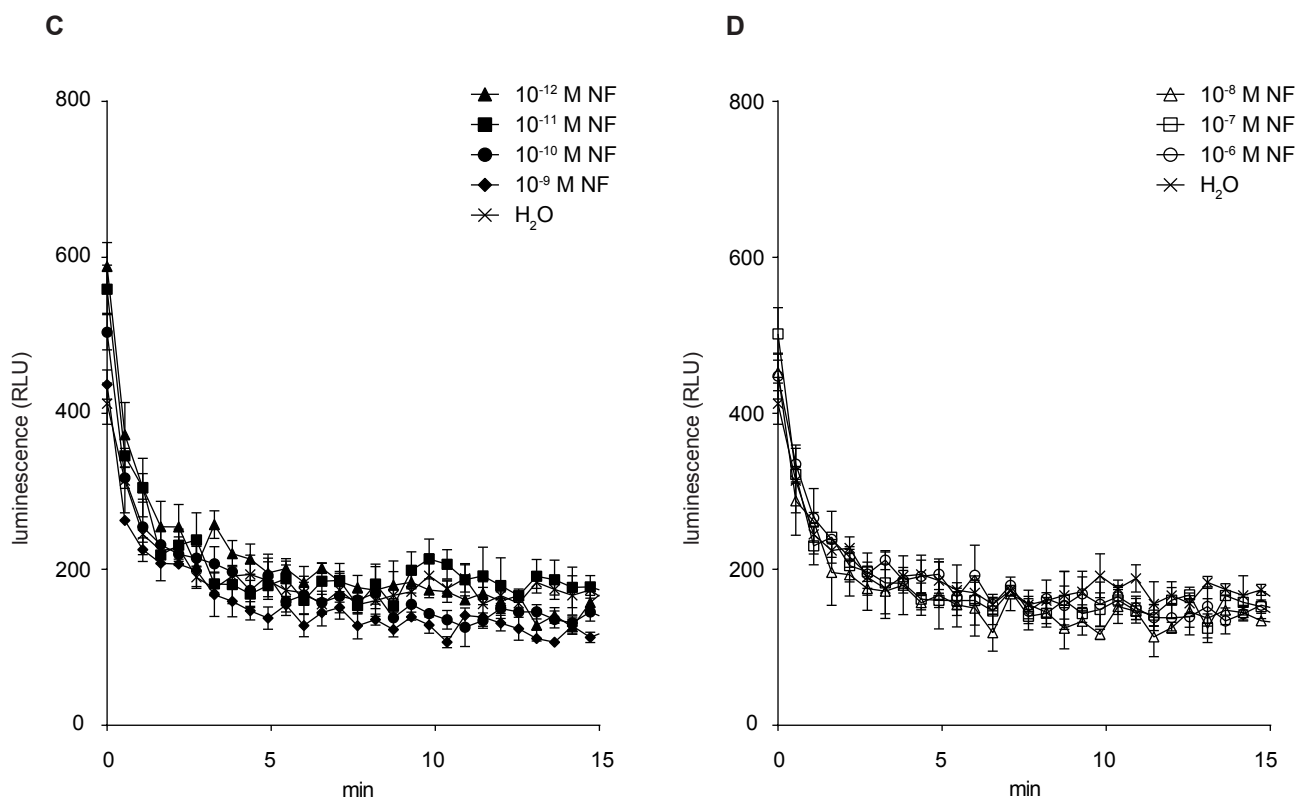

**Fig. S3.** Primary luminescence curves for ROS responses elicited by CO8 and Nod factor treatment of roots. Gifu wild type plants were treated with different concentrations of CO8 or purified *M. loti* R7A Nod factor. (A) and (B) ROS response after  $10^{-12}$ - $10^{-6}$  M CO8 treatment. (C) and (D) ROS response after  $10^{-12}$ - $10^{-6}$  M Nod factor treatment. Values are plotted as relative light units (RLU) and error bars represent the s.e.m.

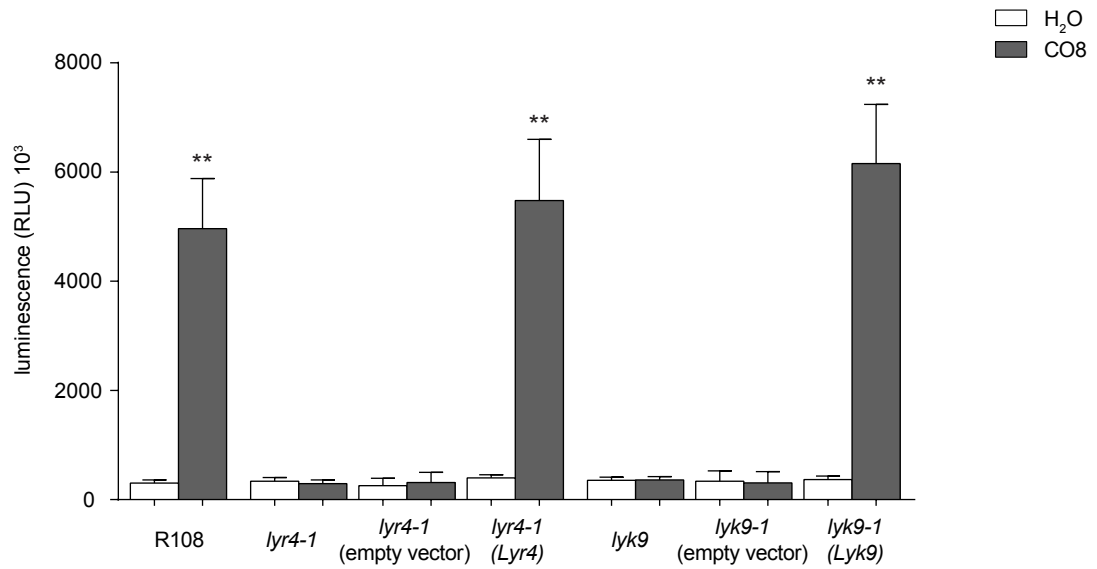

**Fig. S4.** ROS measurements on complemented *Mtlyr4* and *Mtlyk9* mutants.

The complementing genes are shown in brackets. Peak values are plotted as relative light units (RLU) and error bars represent the s.e.m. \*\*P < 0.01 indicate significant difference (*t*-test) between the CO<sub>8</sub> treated sample and the respective water treated control.

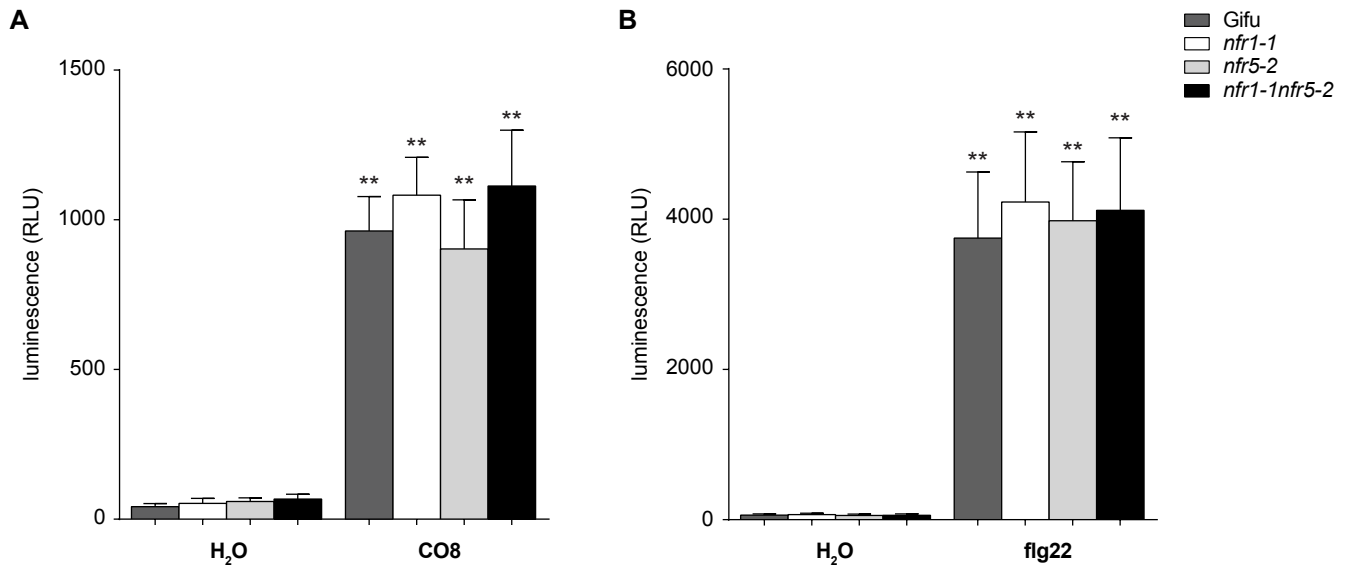

**Fig. S5.** The *Nfr1* and *Nfr5* nod factor receptors are not required for a chitin induced release of ROS. (A) CO8 induced ROS in *nfr1*, *nfr5* and *nfr1 nfr5* double mutants. (B) flg22 induced ROS in *nfr1*, *nfr5* and *nfr1 nfr5* double mutants. Peak values are plotted as relative light units (RLU) and error bars represent the s.e.m. \*\*P < 0.01 indicate significant difference (*t*-test) between the elicitor treated sample and the respective water treated control.

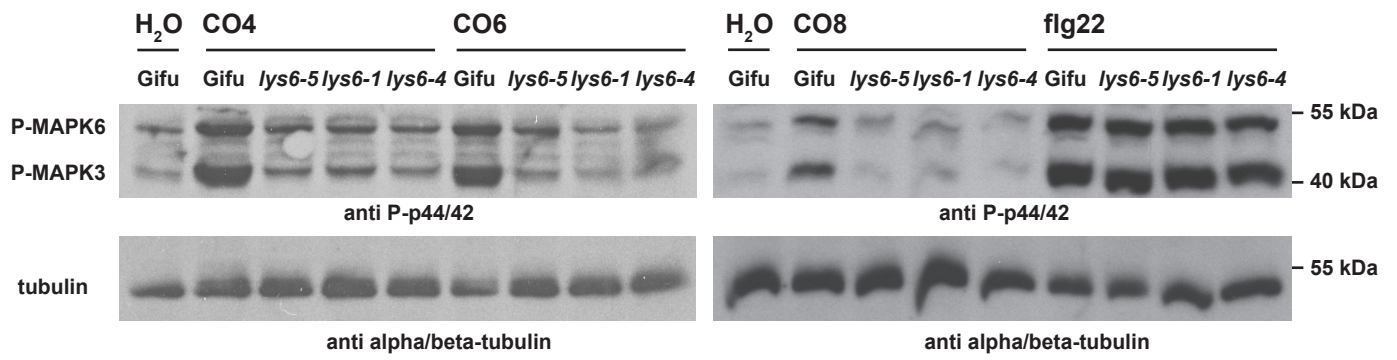

**Fig. S6.** Chitin induced MAPK3/6 phosphorylation in *Lotus* is dependent on *LjLys6*. MAPK3/6 phosphorylation in roots of *Lotus* Gifu, *Ljlys6-1*, *Ljlys6-4* and *Ljlys6-5* mutants treated with 1  $\mu$ M CO4, CO6 and CO8 or 0.5  $\mu$ M flg22.

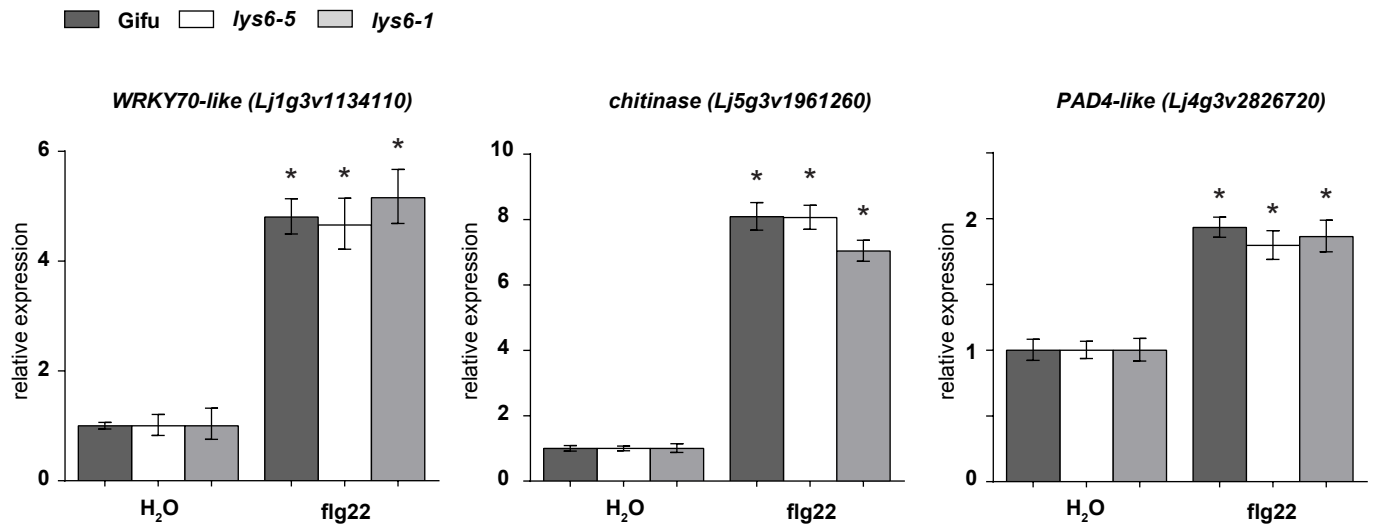

**Fig. S7.** flg22 treatment triggers defense-response gene upregulation in *Ljlys6* mutants similar to wild type. QPCR determination of transcript levels in *Lotus* roots after 1 hour treatment with 0.5  $\mu$ M flg22 or water. The values shown are geometric means of three biological and three technical replicates relative to the respective water treated control set as 1. Bars represent the 95% CI. Asterisk indicates significant difference compared to the respective water treated control.

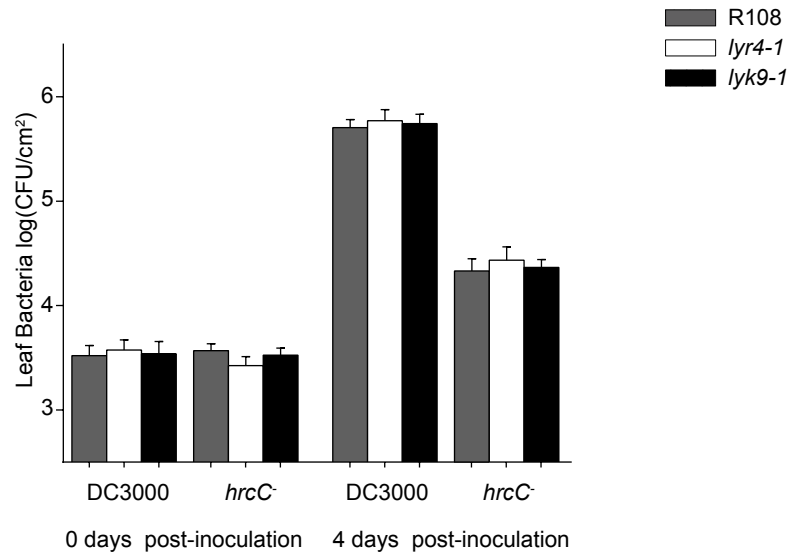

**Fig. S8.** *MtLYR4* and *MtLYK9* are not required for *P. syringae* triggered immunity. Wild type R108 and *lyr4* or *lyk9* mutant *M. truncatula* leaves were infiltrated with *Pst* DC3000 or its type III secretion system mutant strain *Pst hrcC*<sup>-</sup>. Bacterial population (colony-forming units, CFU) in the leaf was measured at the indicated times (error bars represent the s.e.m., n=6). The experiments were repeated three times with similar results.



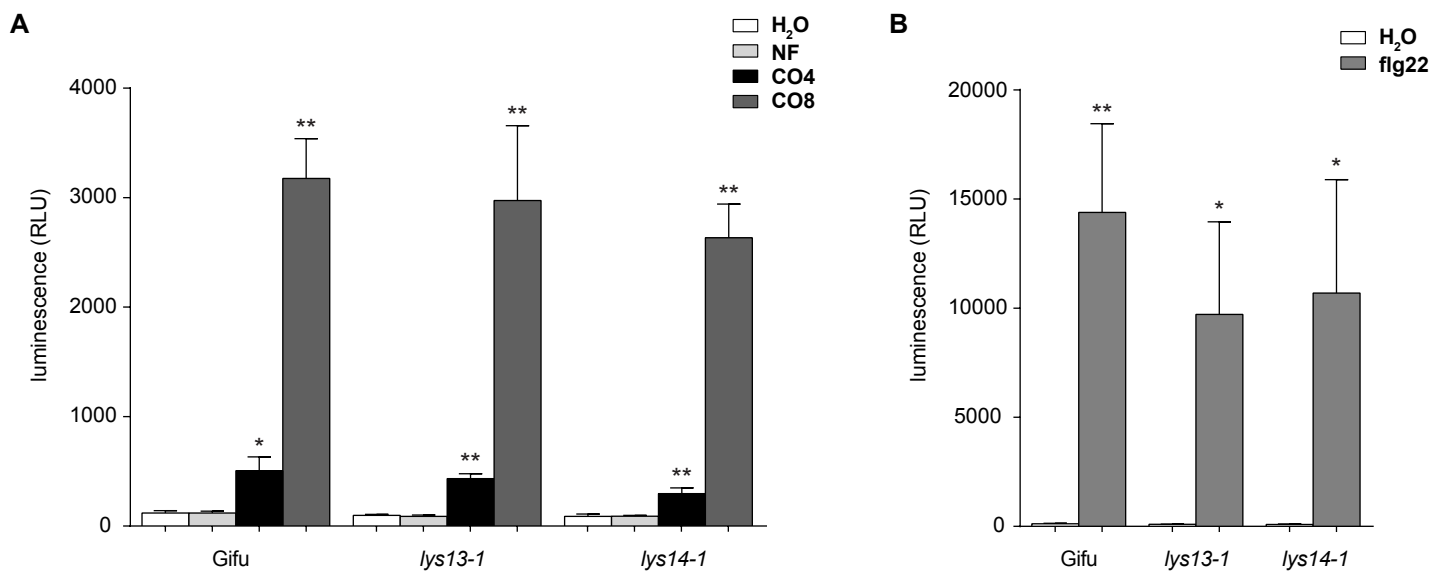

**Fig. S9.** Nod factor, CO4, CO8 and flg22 induced ROS response is unaffected in *Ljlys13* and *Ljlys14* single mutants. (A) Nod factor, CO4 and CO8 induced ROS in Gifu wild type, *Ljlys13* and *Ljlys14* single mutants. (B) flg22 induced ROS in Gifu, *Ljlys13* and *Ljlys14* single mutants. Peak values are plotted as relative light units (RLU) and error bars represent the s.e.m. \*P < 0.05, \*\*P < 0.01 indicate significant difference (*t*-test) between the elicitor treated sample and the respective water treated control.

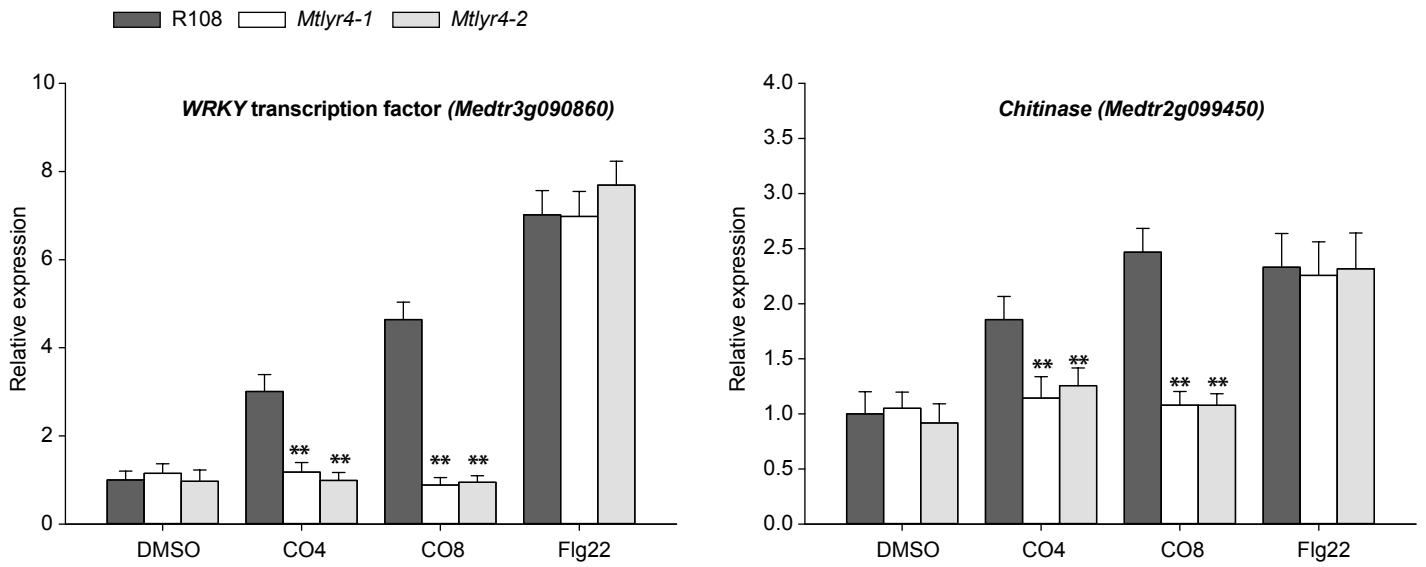

**Fig. S10.** *MtLYR4* is required for CO4 and CO8 induced defense-related gene expression. Quantitative RT-PCR analysis of two defense-related genes *WRKY* and a *chitinase* in *M. truncatula* wild type R108 and *lyr4* mutants after treatment with 100 nM CO4, CO8, flg22 or DMSO as the negative control (mean+s.e.m., n=8; \*\*indicates significant difference relative to wild type, p<0.01 measured using a Student's *t*-test).

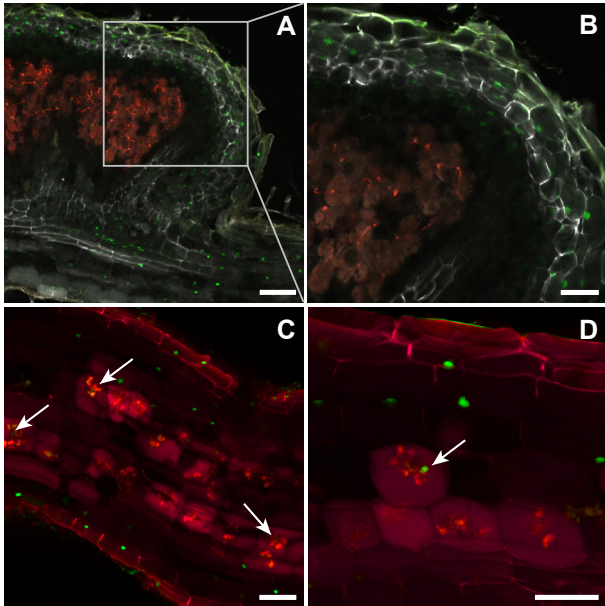

**Fig. S11.** *LjLys6* promoter expression pattern in root nodules and in arbusculated root cells.

(A) and (B) Lack of detectable activity of the *proLys6:NLS-tYFP* reporter in mature root nodules with *M. loti* bacteroids expressing DsRed. (B) Close up of the area marked in (A). (C) and (D) Activity of the *proLys6:NLS-tYFP* reporter in root cells with fungal arbuscules. Autofluorescence of arbuscules is shown in orange-red. Arrows label nuclei of arbuscule containing root cells showing *LjLys6* promoter activity. Scale bars: 100  $\mu\text{M}$  (A) and 50  $\mu\text{M}$  (B-D).

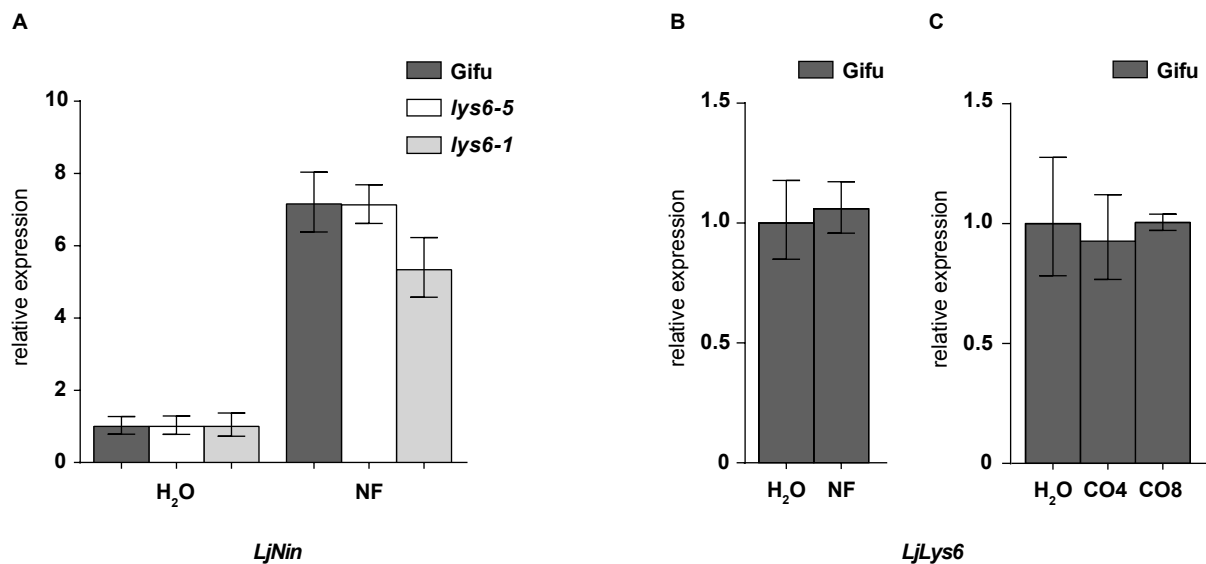

**Fig. S12.** QPCR determination of transcript levels after Nod factor, CO4 and CO8 treatment of *Lotus* roots. (A) Nod factor induced *LjNin* expression in wild type Gifu and *Ljlys6* mutants. *LjLys6* gene expression after (B) Nod factor and (C) CO4, CO8 treatment of Gifu roots. The values shown are geometric means of three biological and three technical replicates relative to the respective water treated control set as 1. Bars represent the 95% CI.

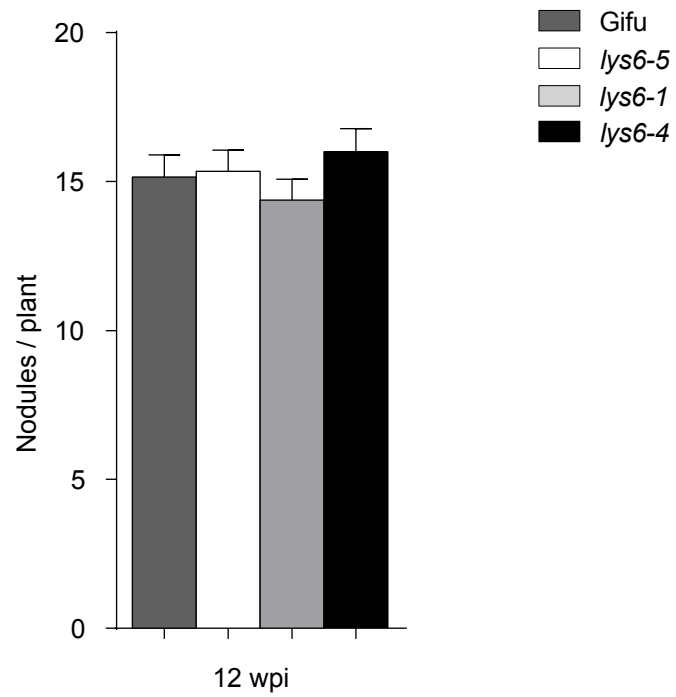

**Fig. S13.** Long term nodulation test on *Ljlys6* mutants.

Plants were inoculated with *M. loti* NZP2235 (OD<sub>600</sub>=0.02) and grown for 12 weeks in the greenhouse. Bars represent the s.e.m. (n=70). No significant difference was found between Gifu and the *Ljlys6* mutants (*t*-test).

| <b>DATA COLLECTION</b>         |                                  |
|--------------------------------|----------------------------------|
| PDB accession                  | 5LS2                             |
| Beamline                       | MAX-lab I911-3                   |
| Wavelength                     | 0.98                             |
| Resolution range               | 28.23 - 2.3 (2.38 - 2.3)         |
| Space group                    | P 1 21 1                         |
| Unit cell                      | 45.29 130.69 53.63 90 107.702 90 |
| Total reflections              | 111281 (11297)                   |
| Unique reflections             | 26292 (2625)                     |
| Completeness (%)               | 99.5 (99.8)                      |
| Mean I/sigma(I)                | 15.07 (2.20)                     |
| Wilson B-factor                | 44.64                            |
| R-meas                         | 0.0795 (0.977)                   |
| <b>REFINEMENT</b>              |                                  |
| Reflections used in refinement | 26273 (2624)                     |
| R-work                         | 0.183 (0.267)                    |
| R-free                         | 0.218 (0.303)                    |
| Number of non-hydrogen atoms   | 3310                             |
| macromolecules                 | 3000                             |
| ligands                        | 178                              |
| Protein residues               | 391                              |
| RMS(bonds)                     | 0.002                            |
| RMS(angles)                    | 0.46                             |
| Ramachandran favored (%)       | 98.2                             |
| Ramachandran allowed (%)       | 1.8                              |
| Ramachandran outliers (%)      | 0                                |
| Rotamer outliers (%)           | 0.89                             |
| Average B-factor               | 60.17                            |
| macromolecules                 | 59.46                            |
| ligands                        | 77.68                            |
| solvent                        | 52.87                            |

**Table S1.**

*Lj*LYS6 data collections and refinement statistics.

Values between parentheses are for the last resolution shell.

| target gene        | <i>L. japonicus</i><br>v3.0 gene ID | primer<br>orientation | primer sequence (5'-3')                                    | comment   | reference    |
|--------------------|-------------------------------------|-----------------------|------------------------------------------------------------|-----------|--------------|
| <i>ATP</i>         | <i>Lj5g3v2169420</i>                | fw<br>rev             | CAATGTCGCCAAGGCCCATGGTG<br>AACACCACTCTCGATCATTCTCTG        | qPCR      |              |
| <i>PP2A</i>        | <i>Lj2g3v0742070</i>                | fw<br>rev             | GTAATGCGTCTAAAGATAGGGTCC<br>ACTAGACTGTAGTGCTTGAGAGGC       | qPCR      |              |
| <i>UBC</i>         | <i>Lj1g3v2063210</i>                | fw<br>rev             | ATGTGCATTTAAGACAGGG<br>GAACGTAGAAGATTGCCTGAA               | qPCR      |              |
| <i>Lys6</i>        | <i>Lj6g3v1055580</i>                | fw<br>rev             | CCTGTTGATTCAGTTCGCAAGATGGC<br>GCTTTACTGTCAACCATCCTATCTTCC  | qPCR      |              |
| <i>NIN</i>         | <i>Lj2g3v3373100</i>                | fw<br>rev             | AGGAGCCCAAGTGAGTGCTA<br>GCCATCAAGGTATATGACGAG              | qPCR      |              |
| <i>peroxidase</i>  | <i>Lj1g3v1183610</i>                | fw<br>rev             | CTCTTTCGGGTTTTGTTCTGTGT<br>CAGAAGCTAACCTTGACTTGTTGATG      | qPCR      | (76)<br>(76) |
| <i>chitinase</i>   | <i>Lj5g3v1961260</i>                | fw<br>rev             | GCAGTGTCTGATTAGTTAGTCTCA<br>GAAGTGATCACATACAGTACTCAAC      | qPCR      | (76)<br>(76) |
| <i>RbohB-like</i>  | <i>Lj6g3v1549190</i>                | fw<br>rev             | GAAATGGCGTACTGTCTTTAAACCA<br>GGTGGTTTTCTCGAAAAGTCAAGA      | qPCR      | (76)<br>(76) |
| <i>WRKY70-like</i> | <i>Lj1g3v1134110</i>                | fw<br>rev             | TCTCAATCCCCAGGAGTTACTTC<br>TTGATCGGAGTGTCTTTGCATG          | qPCR      |              |
| <i>PRp27-like</i>  | <i>Lj5g3v2112200</i>                | fw<br>rev             | CATGGTTATGATGTTACTGCTCGT<br>GATCACTATAACCAGTCTCATCT        | qPCR      | (76)<br>(76) |
| <i>PAD4-like</i>   | <i>Lj4g3v2826720</i>                | fw<br>rev             | CATAGCAAACCAGGAAACCACTATC<br>CATCACACCAAATTTGTACCATT       | qPCR      |              |
| <i>MPK3</i>        | <i>Lj3g3v3087330</i>                | fw<br>rev             | ATTGATCCCACAAAAGAATCACAGTTGAA<br>CCAATGCTTCCCTGTAGATCATCTC | qPCR      |              |
| <i>WRKY53</i>      | <i>Lj3g3v2427550</i>                | fw<br>rev             | GGAAGTCCCTCTCATGCTAGTTAAG<br>CTCTTGCTATTGCTTGAGCCAGAAG     | qPCR      |              |
| <i>Lys6</i>        | <i>Lj6g3v1055580</i>                | fw<br>rev             | GAACACCCAGATTAGGGTTCCCC<br>CAGGTTAAGATGATGAACACG           | semi-qPCR |              |
| <i>Lys13</i>       | <i>Lj2g3v2899910</i>                | fw<br>rev             | GCTATGCTCCTCTTCTACAAGC<br>ACGGTGACCATGGTGTGCGGTGATG        | semi-qPCR |              |
| <i>Lys14</i>       | <i>Lj2g3v2899900</i>                | fw<br>rev             | CAGGAAGAGAAGCCACAAGTAGTGGGG<br>CACAGAATTTATTATGGCTTCAG     | semi-qPCR |              |

  

| target gene      | <i>M. truncatula</i><br>gene ID | primer<br>orientation | primer sequence (5'-3')                             | comment   |
|------------------|---------------------------------|-----------------------|-----------------------------------------------------|-----------|
| <i>Lyk9</i>      | <i>Medtr3g080050</i>            | fw<br>rev             | ATGGAACATCAACCAGATTCACCT<br>CTTTCCCGGAACAAAAACAATGC | semi-qPCR |
| <i>Lyr4</i>      | <i>Medtr5g085790</i>            | fw<br>rev             | ACATCTACCTATGCTACTAAC<br>GTTCATTAGCTTCATTAATGC      | semi-qPCR |
|                  |                                 | fw<br>rev             | CAGTGAAGAGAATAAGATTAAG<br>CAACTTCTCTACCAGAAAGAAGC   | semi-qPCR |
| <i>WRKY</i>      | <i>Medtr3g090860</i>            | fw<br>rev             | ACCAGGAATGGCAATGGAAGGTC<br>AATAGCCTCTTGATGCATGGC    | qPCR      |
| <i>chitinase</i> | <i>Medtr2g099450</i>            | fw<br>rev             | AACACCACCAAGTTTGCCTAGC<br>GGGCACATGTGACTCTGCATTG    | qPCR      |
| <i>H2A</i>       | <i>Medtr4g097170</i>            | fw<br>rev             | CTTTGCTTGGTGCTGTTTAGATGG<br>ATTCAAAGGCGGCTGCATA     | qPCR      |

  

| target gene | species           | primer<br>orientation | primer sequence (5'-3')                            | comment |
|-------------|-------------------|-----------------------|----------------------------------------------------|---------|
| <i>CutA</i> | <i>B. cinerea</i> | fw<br>rev             | ATTCCACAATATGGCATGAAATC<br>ATGTTATCTCCAGCGTGACAAAT | qPCR    |

**Table S2.**  
Primers used in the study.
